## 26 **Abstract**

27 Viral infection requires a swift reaction from the host, which includes a transcriptional response. This  
28 transcriptional response is shaped by genetic variation in the host population, resulting in phenotypic differences  
29 in viral susceptibilities within the infected population. However, regulatory genetic variation in antiviral  
30 responses is not well investigated in the context of the natural host populations. Here, we infect genetically  
31 diverse isolates of the model organism *Caenorhabditis elegans* with Orsay virus to determine their  
32 transcriptional response to infection. The Hawaiian *C. elegans* isolate CB4856 shows low viral susceptibility,  
33 despite lacking the upregulation of Intracellular Pathogen Response (IPR) genes which are known to counteract  
34 viral infection. We subsequently investigated whether temporal differences in IPR timing could explain viral  
35 susceptibility, yet find that the low viral susceptibility of CB4856 unlikely results from an accelerated IPR gene  
36 activation. Instead, our data suggests that regulatory genetic variation, in particular within two key IPR  
37 regulators, determines the host transcriptional defence. Genetic analysis of 330 wild isolates reveals that CB4856  
38 belongs to a minority of strains that show high genetic diversity within the *pals*-genes that are part of the IPR..  
39 The two IPR regulators, *pals-22* and *pals-25*, are located in a genomic region shaped by balancing selection,  
40 therefore different evolutionary strategies in IPR regulation exist. Nevertheless, the vast majority of wild isolates  
41 harbour little genetic variation in the *pals*-genes. Together, this suggests that the worldwide conservation of the  
42 IPR host transcriptional defence in *C. elegans* results from a high evolutionary pressure that pathogens could  
43 impose.

44

## 45 **Introduction**

46 The continuous battle between host and virus drives host genetic variation to arise in antiviral mechanisms such  
47 as transcriptional responses. Regulatory genetic variation affects the viral susceptibility after infection, making  
48 some individuals within the population more resistant than others (Wang et al. 2018; Franco et al. 2013; Piasecka  
49 et al. 2018; van Sluijs et al. 2017). Yet, the universality and mode-of-action of genetic diversity in shaping  
50 antiviral transcriptional responses within natural populations remains largely unknown.

51 *Caenorhabditis elegans* and its natural pathogen Orsay virus (OrV) are used as a powerful genetic  
52 model system to study host-virus interactions (Félix et al. 2011). OrV is a positive-sense single-stranded RNA  
53 virus infecting *C. elegans* intestinal cells where it causes local disruptions of the cellular structures (Félix et al.  
54 2011; Franz et al. 2013). Two major groups of antiviral genes respond to viral infection in *C. elegans*: genes  
55 related to the RNA interference (RNAi) pathway (Félix et al. 2011; Tanguy et al. 2017; Sterken et al. 2014;

56 Sarkies et al. 2013; Ashe et al. 2013, 2015; Guo et al. 2013) and genes related to the Intracellular Pathogen  
57 Response (IPR) (Bakowski et al. 2014; Reddy et al. 2017, 2019; Chen et al. 2017). The RNAi pathway activity is  
58 controlled by the gene *sta-1* which in turn is activated by the viral sensor *sid-3* that is hypothesized to directly  
59 interact with the Orsay virus (Tanguy et al. 2017). Subsequently, the antiviral RNAi components *dcr-1*, *drh-1*,  
60 and *rde-1* degrade the viral RNA (Sarkies et al. 2013), but the RNAi genes themselves remain equally expressed  
61 during infection (Chen et al. 2017; Sarkies et al. 2013). The IPR counteracts infection by intracellular pathogens  
62 (including OrV) and increases the ability to handle proteotoxic stress (Bakowski et al. 2014; Reddy et al. 2017,  
63 2019). The gene *pals-22* co-operates together with *pals-25* to control the IPR pathway by functioning as a  
64 molecular switch between growth and antiviral defence. *Pals-22* promotes development and lifespan, whereas  
65 *pals-25* stimulates pathogen resistance. Together *pals-22* and *pals-25* regulate a set of 80 genes that are  
66 upregulated upon intracellular infection including 25 genes in the *pals*-family and several members of the  
67 ubiquitination response (Reddy et al. 2017, 2019).. Both *pals-22* and *pals-25* do not change gene expression  
68 following OrV infection. In total, the *pals*-gene family contains 39 members mostly found in five genetic  
69 clusters on chromosome I, III, and V.. Recently, a third antiviral defence was identified which degrades the viral  
70 genome after uridylation by the gene *cde-1* (Le Pen et al. 2018). Together, these antiviral pathways are key in  
71 controlling OrV infection in *C. elegans*.

72 The transcriptional responses following infection have so far been studied in the *C. elegans* laboratory  
73 strain N2, in RNAi deficient mutants in the N2 background such as *rde-1* and *dcr-1* and in the RNAi-deficient  
74 wild isolate JU1580 (Tanguy et al. 2017; Sarkies et al. 2013; Reddy et al. 2017; Chen et al. 2017; Bakowski et  
75 al. 2014; Ashe et al. 2013). These studies indicate the presence of intraspecies variation in the transcriptional  
76 response. For example, *C. elegans rde-1* and *dcr-1* mutants and JU1580 are deficient in the RNAi pathway and  
77 all show high viral susceptibility, yet their transcriptional responses differ substantially (Sarkies et al. 2013; Félix  
78 et al. 2011). Further, several *pals*-genes differ in expression levels between N2 and the RNAi mutants on one  
79 hand and JU1580 on the other hand (Sarkies et al. 2013). However, the link between the genetic background and  
80 the transcriptional responses is not fully understood. Understanding the transcriptional responses in diverse  
81 genetic backgrounds will provide insight into understanding the natural variation within the antiviral defence  
82 mechanisms.

83 Here we studied the transcriptional response of the *C. elegans* Hawaiian isolate CB4856 in comparison  
84 to the response in N2. CB4856 has high genetic diversity compared to N2 (Thompson, et al. 2015) and the  
85 transcriptional profile of this strain has been well-studied under multiple conditions e.g. (Snoek et al. 2017;

86 Capra et al. 2008; Li et al. 2006; Viñuela et al. 2012). We found that CB4856 is less susceptible to viral infection  
87 than the N2 strain, but lacks upregulation of the antiviral IPR genes. The temporal dynamics of the  
88 transcriptional response in three genetic backgrounds, N2, JU1580, and CB4856 demonstrates that gene  
89 expression patterns for multiple genes responding to OrV infection are highly dynamic, but does not show  
90 evidence for an accelerated activation of established antiviral IPR members in CB4856. The strains N2 and  
91 CB4856 differ in (basal) gene expression of several *pals*-genes, including *pals-22* and *pals-25* that control the  
92 IPR transcriptional response. Our data suggests that regulatory genetic variation within the *pals*-family underlies  
93 this difference. Contrary, most strains among a set of 330 wild isolates show little genetic variation for genes in  
94 the *pals*-family, suggesting that high selective pressure exists to conserve the IPR transcriptional response.

95 **Materials and Methods**

96 *Nematode strains and culturing*

97 *C. elegans* wild-types strains N2 (Bristol) and CB4856 (Hawaii) were kept on 6-cm Nematode Growth Medium  
98 (NGM) dishes containing *Escherichia coli* strain OP50 as food source (Brenner 1974). Strains were kept in  
99 maintenance culture at 12°C and the standard growing temperature for experiments was 20°C. Fungal and  
100 bacterial infections were cleared by bleaching (Brenner 1974). The strains were cleared of males prior to the  
101 experiments by selecting L2 larvae and placing them individually in a well in a 12-wells plate at 20°C.  
102 Thereafter, the populations were screened for male offspring after 3 days and only the 100% hermaphrodite  
103 populations were transferred to fresh 9-cm NGM dishes containing *E. coli* OP50 and grown until starved.

104

105 *Orsay virus infection assay*

106 Orsay virus stocks were prepared according to the protocol described before (Félix et al. 2011). After bleaching,  
107 nematodes were infected using 20, 50, or 100µL Orsay virus/500µL infection solution as previously described  
108 (Sterken et al. 2014). Mock infections were performed by adding M9 buffer instead of Orsay virus stock  
109 (Brenner 1974). The samples for the viral load and transcriptional analysis were infected in Eppendorf tubes with  
110 50µL Orsay virus/500µL infection solution 26 hours post bleaching (L2-stage) (8 biological replicates per  
111 treatment per genotype). The nematodes were collected 30 hours after infection. The samples for the  
112 transcriptional analysis of the time-series were infected with 50µL Orsay virus/500µL infection solution at 40  
113 hours post bleaching (L3-stage). The nematodes were collected at time points: 1.5, 2, 3, 8, 10, 12, 20.5, 22, 24,  
114 28, 30.5, or 32 hours post-infection (1 biological replicate per treatment per genotype per time point). Viral loads  
115 of the samples were determined by RT-qPCR as described by (Sterken et al. 2014).

116

117 *RNA isolation*

118 The RNA of the samples in the transcriptional analysis (infected 26hpb and collected 56hpb) was isolated using  
119 Maxwell® 16 Tissue LEV Total RNA Purification Kit, Promega according to the manufacturer's instructions  
120 including two modifications. First, 10 µL proteinase K was added to the samples (instead of 25 µL). Second,  
121 after the addition of proteinase K samples were incubated at 65°C for 10 minutes while shaking at 350 rpm.  
122 Quality and quantity of the RNA were measured using the NanoDrop-1000 spectrophotometer (Thermo  
123 Scientific, Wilmington DE, USA).

124 The RNA of the samples in the time series was isolated using the RNeasy Micro Kit from Qiagen  
125 (Hilden, Germany). The ‘Purification of Total RNA from Animal and Human Tissues’ protocol was followed,  
126 with a modified lysing procedure; frozen pellets were lysed in 150  $\mu$ l RLT buffer, 295  $\mu$ l RNase-free water, 800  
127  $\mu$ g/ml proteinase K and 1%  $\beta$ -mercaptoethanol. The suspension was incubated at 55°C at 1000 rpm in a  
128 Thermomixer (Eppendorf, Hamburg, Germany) for 30 minutes or until the sample was clear. After this step the  
129 manufacturer’s protocol was followed. Quality and quantity of the RNA were measured using the NanoDrop-  
130 1000 spectrophotometer (Thermo Scientific, Wilmington DE, USA) and RNA integrity was determined by  
131 agarose gel electrophoresis (3  $\mu$ L of sample RNA on 1% agarose gel).

132

### 133 *cDNA synthesis, labelling and hybridization*

134 The ‘Two-Color Microarray-Based Gene Expression Analysis; Low Input Quick Amp Labeling’ -protocol,  
135 version 6.0 from Agilent (Agilent Technologies, Santa Clara, CA, USA) was followed, starting from step five.  
136 The *C. elegans* (V2) Gene Expression Microarray 4X44K slides, manufactured by Agilent were used.

137

### 138 *Data extraction and normalization*

139 The microarrays were scanned by an Agilent High Resolution C Scanner with the recommended settings. The  
140 data was extracted with Agilent Feature Extraction Software (version 10.7.1.1), following manufacturers’  
141 guidelines. Normalization of the data was executed separately for the transcriptional response data (infected at  
142 26 and collected at 56 hours post bleaching) and the transcriptional response of the time series. For  
143 normalisation, “R” (version 3.3.1. x64) with the Limma package was used. The data was not background  
144 corrected before normalization (as recommended by (Zahurak et al. 2007)). Within-array normalization was  
145 done with the Loess method and between-array normalization was done with the Quantile method (Smyth and  
146 Speed 2003). The obtained single channel normalized intensities were  $\log_2$  transformed and the transcriptional  
147 response data (infected 26hpb) was batch corrected for the two different virus stocks that were used for infection.  
148 The obtained (batch corrected)  $\log_2$  intensities were used for further analysis using the package ‘tidyverse’  
149 (1.2.1) in “R” (3.3.1, x64).

150 The transcriptome datasets generated are deposited at ArrayExpress (E-MTAB-7573 and E-MTAB-  
151 7574). The data of the 12 N2 mock samples of the time series has previously been described (Snoek et al. 2015).

152

### 153 *Principal component analysis*

154 A principal component analysis was conducted on the gene-expression data of the both the transcriptional  
155 response and the transcriptional response of the time series. For this purpose, the data was transformed to a log<sub>2</sub>  
156 ratio with the mean, using

$$R_{i,j} = \log_2\left(\frac{y_{i,j}}{\bar{y}_i}\right)$$

157 where R is the log<sub>2</sub> relative expression of spot i (i = 1, 2, ..., 45220) in strain j (N2, CB4856, or JU1580), and y is  
158 the intensity (not the log<sub>2</sub>-transformed intensity) of spot i in strain j. The principal component analyses were  
159 performed independently per experiment. The transformed data was used in a principal component analysis,  
160 where the first six axes that explain above 4.9% of the variance were further examined.

161

### 162 *Linear model*

163 The log<sub>2</sub> intensity data of the nematodes that were infected 26hpb and collected 56hpb was analysed using the  
164 linear model

165

$$Y_i = G + T + G \times T + \varepsilon$$

166

167 with Y being the log<sub>2</sub> normalised intensity of spot i (1, 2, ..., 45220). Y was explained over genotype (G; either  
168 N2 or CB4856), treatment (T, either infected or mock), the interaction between genotype and treatment and the  
169 error term ε. The significance threshold was determined by the *p.adjust* function, using the Benjamini &  
170 Hochberg correction (FDR < 0.1 for T and GxT, FDR < 0.05 for G) (Benjamini and Hochberg 2009).

171 The log<sub>2</sub> intensity data for samples of the time series was analysed using the linear model

172

$$Y_i = D + G + T + \varepsilon$$

173

174 with Y being the log<sub>2</sub> normalised intensity of spot i (1, 2, ..., 45220). Y was explained over development (D, time  
175 of isolation: 1.5, 2, 3, 8, 10, 12, 20.5, 22, 24, 28, 30.5, or 32 hours post-infection ), genotype (G; either N2 or  
176 CB4856), treatment (T; either infected or mock) and the error term ε. The significance threshold was determined  
177 by the *p.adjust* function, using the Benjamini & Hochberg correction (FDR < 0.05) (Benjamini and Hochberg  
178 2009).

179

### 180 *Functional enrichment analysis*

181 Gene group enrichment analyses were performed using a hypergeometric test and several databases with  
182 annotations. The databases used were: the WS258 gene class annotations, the WS258 GO-annotation, anatomy  
183 terms, phenotypes, RNAi phenotypes, developmental stage expression, and disease related genes  
184 ([www.wormbase.org](http://www.wormbase.org)) (Lee et al. 2018; Stein et al. 2002); the MODENCODE release 32 transcription factor  
185 binding sites ([www.modencode.org](http://www.modencode.org)) (Gerstein et al. 2000), which were mapped to transcription start sites (as  
186 described by (Tepper et al. 2013)). Furthermore, a comparison with previously identified genes involved in OrV  
187 infection was made using a custom made database (Table S1).

188 Enrichments were selected based on the following criteria: size of the category  $n > 3$ , size of the overlap  
189  $n > 2$ . The overlap was tested using a hypergeometric test, of which the p-values were corrected for multiple  
190 testing using Bonferroni correction (as provided by `p.adjust` in R, 3.3.1,  $\times 64$ ). Enrichments were calculated based  
191 on unique gene names, not on spots.

192

#### 193 *Probe alignment*

194 Probe sequences of the *pals*-genes (*C. elegans* (V2) Gene Expression Microarray 4X44K slides, Agilent) were  
195 aligned to the genome sequence of CB4856 (PRJNA275000) using the BLAST function of Wormbase (WS267).

196

#### 197 *Genetic variation analysis*

198 Data on *C. elegans* wild isolates were obtained from the CeDNR website (release 20180527) (Cook et al. 2017).  
199 The data was further processed using custom made scripts  
200 ([https://git.wur.nl/mark\\_sterken/Orsay\\_transcriptomics](https://git.wur.nl/mark_sterken/Orsay_transcriptomics)). In short, the number of polymorphisms in the *pals*-  
201 family within a strain was compared to the total number of natural polymorphisms found in that that strain. The  
202 N2 strain was used as the reference strain. A chi-square test (FDR < 0.0001) was used to determine whether  
203 strains showed less or more variation than expected within the *pals*-gene family.

204 The number of polymorphisms within the *pals*-gene family was further specified per gene. Tajima's D  
205 values were calculated per gene within the *C. elegans* genome using the PoPGenome package (Pfeifer et al.  
206 2014). The number of polymorphisms within the *pals*-gene family were compared to the geographical origin of  
207 the strain obtained from the CeDNR database (Cook et al. 2017). The data were visualised using the packages  
208 'maps' (3.3.0) and 'rworldmap' (1.3-6) using custom written scripts  
209 ([https://git.wur.nl/mark\\_sterken/Orsay\\_transcriptomics](https://git.wur.nl/mark_sterken/Orsay_transcriptomics)).



## 210 **Results**

### 211 *The C. elegans strains N2, JU1580, and CB4856 differ in viral susceptibility*

212 Three strains with a different genetic background were exposed to Orsay virus (OrV) to determine their viral  
213 susceptibility. Different levels of OrV (20, 50, or 100 $\mu$ L OrV/500 $\mu$ L infection solution) were used to investigate  
214 which amount was needed to reach the maximum viral load at 30 hours after infection. The strains were infected  
215 26 hours post bleaching and were collected as young adults before the start of egg-laying (Fig 1A). In line with  
216 previous research the strain JU1580 was more susceptible than the strain N2 (Sterken et al. 2014; Félix et al.  
217 2011). CB4856 showed a lower viral load than N2 and JU1580, therefore being the least susceptible of the three  
218 strains (Fig 1B). The maximum viral load could be reached using 50 $\mu$ L OrV/500 $\mu$ L infection solution for all  
219 three strains which was therefore used in subsequent experiments (Fig 1B). The genotypes N2 and CB4856 were  
220 used for further transcriptional analysis.

221

### 222 *The transcriptional response upon Orsay virus infection depends on the genetic background*

223 We infected 26 hour old (L2) nematodes of the strains N2 and CB4856 and allowed the infection to develop for  
224 30 hours. Young adult nematodes (before start of egg-laying) were isolated for transcriptomic analysis. In  
225 parallel, the same experiment was conducted with a mock-infection at 26 hours (Figure 1A). First, the  
226 transcriptional response of the strains N2 and CB4856 after OrV infection was analysed by means of a principal  
227 component analysis (PCA). Genotype explained the main difference in gene expression patterns (36.1%), which  
228 is in line with previous results, for example (Snoek et al. 2017; Capra et al. 2008; Li et al. 2006). The PCA  
229 showed that the effect of OrV infection is relatively small, explaining less than 5% of the total variance (Fig S1).  
230 Therefore, only a mild transcriptional response to infection is to be expected in further analyses.

231 Gene expression analysis by a linear model showed that 18 genes were differentially expressed upon  
232 infection by OrV (FDR < 0.1) (Fig 2A) and 15 genes were differentially expressed by a combination of both  
233 treatment and genotype (FDR < 0.1) (Fig 2B). These two groups of genes were largely overlapping (Fig 2C),  
234 because most genes only respond to infection in the genotype N2 (Fig 2D). Moreover, among the 7541 genes  
235 that were differentially expressed between N2 and CB4856 - under both mock and infected conditions - were  
236 180 genes known to be involved in OrV infection (hypergeometric test, FDR < 0.05). As CB4856 populations  
237 showed lower viral loads, the lack of a transcriptional response may result from fewer infected nematodes or  
238 infected cells, but it may also result from a difference in (the timing of) the transcriptional response. The genes  
239 that were found to respond to OrV infection in the N2 strain were enriched for the *pals*-family gene class and the

240 genes were associated with dopaminergic neurons, amphid- and sheath cells (FDR < 0.05), which was in  
241 agreement with previous studies (Chen et al. 2017; Sarkies et al. 2013).

242

### 243 *Time-dependent transcription of Orsay virus response genes*

244 The transcriptional response of three genotypes, N2, CB4856, and JU1580, was measured over a time-course to  
245 investigate the dynamics of the transcriptional response. Nematodes were infected in the L3 stage (40 hours after  
246 bleaching) and collected 1.5-32h after infection (Fig 3A). Thereby, a high resolution timeseries of transcriptional  
247 data for three genotypes and two treatments was obtained. We hypothesised that the low viral susceptibility of  
248 CB4856 could result from early activation of IPR genes, thereby counteracting the viral infection more promptly  
249 than N2.

250 A PCA indicated that time of isolation explains most of the variance (38.4%) in the gene expression for  
251 all three strains, both with and without infection. This fits previous results, where the transcriptional response  
252 over the course of the L4 stage was shown to be highly dynamic (Snoek et al. 2015). The similarity between  
253 mock and infected samples suggested that the infection with OrV does not affect the transcriptional patterns of  
254 development. Genotype (either N2, CB4856, or JU1580) explained another large part of the variance (21.8%)  
255 (Fig S3). The effect of virus on global gene expression was relatively small and explained less than 4.9% of the  
256 variance.

257 Subsequently, the time series data was analysed using a linear model to identify variation in gene  
258 expression over time as a result of development, genotype, or infection. Over 10,000 genes were differentially  
259 expressed over time (FDR < 0.05) confirming that development was a major determinant of gene expression  
260 (Snoek et al. 2015). None of the genes were affected by infection when analysed with the linear model. Yet, the  
261 use of a linear model will only detect linear expression dynamics. Therefore, we investigated the temporal  
262 expression of several infection-responsive genes found in the N2 and CB4856 experiment in more detail (Figure  
263 3B, Figure S3). The average increase in gene expression over time was estimated by calculating the correlation  
264 coefficient ( $r$ ) for all Genes responding to OrV infection (excluding *best-24* and F58F6.3 that showed  
265 downregulation upon infection before) (Figure S3B). Gene expression for infection-responsive genes in N2  
266 increased roughly 40% ( $r_{\text{mock}} = 0.00$  and  $r_{\text{infected}} = 0.40$ ). In JU1580 there is smaller increase of about 20% ( $r_{\text{mock}} =$   
267  $-0.04$  and  $r_{\text{infected}} = 0.14$ ). Contrary, in CB4856 genes that respond upon OrV infection in N2 became lower  
268 expressed in both mock and infected conditions over time ( $r_{\text{mock}} = -0.25$  and  $r_{\text{infected}} = -0.21$ ). Subsequently, the  
269 dynamics per gene were investigated and showed distinct expression patterns depending on the genetic

270 background (Figure 3B, S3A). Genes expression of F26F2.1 and F26F2.4 rises gradually in the genotypes N2  
271 and JU1580 after infection (F26F2.1:  $\Delta r = 0.64$  and  $\Delta r = 0.76$  respectively, F26F2.4:  $\Delta r = 0.88$  and  $\Delta r = 0.74$   
272 respectively) but not in the genotype CB4856 (F26F2.1:  $\Delta r = -0.06$ , F26F2.4:  $\Delta r = -0.19$  respectively) indicating  
273 that these IPR genes were not activated in CB4856. Also within the *pals*-gene family expression patterns were  
274 different between CB4856 and N2 and JU1580. For example, over the timeframe of 30 hours expression of the  
275 gene *pals-11* increased most in N2 ( $\Delta r = 1.23$ ), however for CB4856 expression peaked at ~20 hours after  
276 infection reaching the highest maximum throughout the investigated period. In general, for CB4856 expression  
277 of the genes responding to OrV infection, was more dynamic than in N2 and JU1580 showing more fluctuation  
278 within the measured timeframe (Figure S3A). Together, this indicates that genetic variation can determine the  
279 developmental or infection response patterns for OrV-response genes. Of note, the IPR genes in CB4856 were  
280 similarly expressed under mock and infected conditions, even though the temporal dynamics may vary when  
281 compared to N2. Therefore, we conclude that the viral resistance of CB4856 unlikely results from an accelerated  
282 IPR, but instead results from genetic variation acting on basal gene expression.

283

#### 284 *Transcription of genes in the pals-family is not linked to OrV infection in CB4856*

285 Members of the *pals*-gene family were previously shown to be involved in the IPR transcriptional response  
286 defending against OrV infection and other intracellular pathogens in the strain N2 (Sarkies et al. 2013; Chen et  
287 al. 2017; Reddy et al. 2017, 2019). However, in the strain JU1580 several of the *pals*-genes were not  
288 differentially expressed after infection (Sarkies et al. 2013) just as they were not differentially expressed in the  
289 genotype CB4856 (Fig 2C). Interestingly, the RNAi deficient strain JU1580 is highly susceptible upon viral  
290 infection (Sterken et al. 2014; Félix et al. 2011; Ashe et al. 2013), whereas CB4856 is more resistant than both  
291 JU1580 and N2 (Fig 1B). To gain a better understanding of this unexpected result, the transcriptional response in  
292 the *pals*-gene family was explored in more detail from the genotypes N2 and CB4856 30h after infection.

293 Many of the *pals*-gene family members became higher expressed after infection in N2, but not in the  
294 strain CB4856 (Fig 4A). In agreement with literature, the *pals*-genes in the cluster on chromosome III (*pals-17*  
295 until *pals-25*) were not differentially expressed after OrV infection (Leyva-Díaz et al. 2017; Reddy et al. 2017).  
296 Two of these genes, the paralogs *pals-22* and *pals-25*, regulate the IPR transcriptional response (Reddy et al.  
297 2017, 2019) and for both genes the expression is higher in N2 than the CB4856 genotype under mock as well as  
298 infected conditions (Fig 4A), which may affect gene expression of other IPR members. Multiple *pals*-genes with  
299 unknown function were highly expressed under mock conditions in CB4856, but not in N2. The most extreme

300 example was *pals-14*. Upon infection in N2 the expression of *pals-14* increased roughly 4-fold, where after the  
301 *pals-14* expression in N2 equalled that in CB4856 under both uninfected and infected conditions (Fig 4B).

302 Genetic variation could underlie differences in gene expression. Therefore, the number of  
303 polymorphisms between N2 and CB4856 were calculated per *pals*-gene and compared to total genetic variation  
304 present for that gene in natural populations (Cook et al. 2017). The strain CB4856 harbours much of the total  
305 genetic variation known to occur in nature for the genomic *pals*-clusters on chromosome III and V (Cook et al.  
306 2017) (Fig 4C). Given that our experiment used microarrays, differential expression could be due to  
307 hybridisation errors (Snoek et al. 2017; Alberts et al. 2007). Therefore, the probe sequences were compared to  
308 the genome of CB4856, showing that most probes align at the correct location (Table S2). The alignment shows  
309 that expression patterns for at least 20 out of 31 investigated *pals*-genes - including *pals-14*, *pals-22*, and *pals-25*  
310 - were highly likely to hybridize to the probe sequence (>95% overlap on the expected chromosomal location)  
311 (Thompson et al. 2015). The remaining 11 *pals*- genes that had low alignment scores were not taken along in  
312 further analyses (Table S2).

313 Most of the genetically diverse *pals*-genes on chromosome III and V have previously been shown to  
314 display local regulation of gene expression (*cis*-QTL) (Table S3). Moreover, at least 10 genes across different  
315 *pals*-clusters were regulated by genes elsewhere in the genome (*trans*-eQTL) (Table S3). Most of the eQTL were  
316 consistently found across multiple studies, environmental conditions and labs (Li et al. 2006; Rockman et al.  
317 2010; Sterken et al. 2014; Li et al. 2010; Viñuela et al. 2010, 2012; Snoek et al. 2017). More specifically, *pals-22*  
318 and *pals-25* that regulate expression of other IPR genes were genetically distinct and differentially expressed  
319 between N2 and CB4856 in these studies (Li et al. 2006; Rockman et al. 2010; Sterken et al. 2014; Li et al. 2010;  
320 Viñuela et al. 2010, 2012; Snoek et al. 2017). Therefore we conclude that regulatory genetic variation within  
321 *pals*-gene family members plays a role in the difference in the IPR between the strains N2 and CB4856.

322

323 *The pals-family regulating the IPR transcriptional response upon intracellular pathogen infection experiences*  
324 *selective pressure*

325 Regulatory genetic variation within the *pals*-family linked to differences in the IPR transcriptional response  
326 between N2 and CB4856. Therefore, the total genetic variation within the *pals*-family was investigated for the  
327 330 wild isolates in the CeNDR database (Cook et al. 2017). We examined whether the *pals*-family contained  
328 genetic variation as compared to an average gene family in *C. elegans* using a chi-square test. For 48 wild  
329 isolates the genetic variation in the *pals*-family is higher than expected (chi-square test, FDR < 0.0001 and ratio

330 *pals*-gene variants/total variants > 1), but 204 isolates of the 330 analysed strains contains less than expected  
331 variation (chi-square test, FDR < 0.0001 and ratio *pals*-gene variants/total variants < 1) (Figure 5A).

332 To investigate the genetic diversity of the *pals*-genes within *C. elegans*, we tested if DNA sequence  
333 divergence appeared random, or that selective forces were acting on the *pals*-family by computing the Tajima's  
334 D values per gene (Figure 5B). Overall, Tajima's D values in *C. elegans* populations were low as a result of  
335 overall low genetic diversity ( $TD_{\text{mean}} = -1.08$ ,  $TD_{\text{median}} = -1.12$ ) (Andersen et al. 2012). Yet, four *pals*-genes  
336 (*pals-17*, *pals-18*, *pals-19*, and *pals-30*) show positive Tajima's D values that indicate either balancing selection  
337 acts on these genes or that there is a low frequency of rare alleles. The most extreme example is *pals-30* that has  
338 an Tajima's D value of 4.8, the highest value of all *C. elegans* genes. In total, 11 out of 39 *pals*-genes have  
339 values that fall within the 10% highest Tajima's D values for *C. elegans* ( $TD > -0.42$ ), including IPR regulators  
340 *pals-22* and *pals-25*.

341 Subsequently, the genetic diversity within each *pals*-gene was analysed to explore if balancing selection  
342 might be acting on genes within this family (Figure S4, Table S4). Several *pals*-genes contain hardly any genetic  
343 variation and are therefore conserved on a worldwide scale. This conserved group contains the *pals-5* gene  
344 which acts downstream in the IPR (Reddy et al. 2017). Other *pals*-genes are highly variable and can contain  
345 hundreds of polymorphisms in a single gene. Interestingly, for most genes in this group few haplotypes exist  
346 worldwide. For example, for the gene *pals-25* strains harbour either an N2-like allele, an allele containing ~30  
347 polymorphisms (CB4856 belongs to this group) or an allele containing ~95 polymorphisms. In total, 19 out of 24  
348 highly variable *pals*-genes show a clear grouping within 2 or 3 haplotypes supporting that balancing selection  
349 could be acting on these genes. In conclusion, individual *pals*-genes are either conserved or few variants occur  
350 for genetically distinct *pals*-genes. In particular the *pals*-genes with a division into a few haplotypes show  
351 atypically high Tajima's D values when compared to other *C. elegans* genes. Thus, the *pals*-gene family is  
352 undergoing evolutionary selection distinct from other genes in the genome possibly resulting from balancing  
353 selection.

354 Some geographical locations may encounter higher selective pressures than others. Therefore, a  
355 geographical map was constructed to compare the *C. elegans* isolation location and the genetic variation found in  
356 the *pals*-genes. However, after mapping the amount of natural variation to the geographical location no clear  
357 pattern could be found (Figure S5). Interestingly, some strains that were isolated from the same location, show  
358 highly different rates of genetic diversity within the *pals*-family even though these strains may encounter similar  
359 (amounts of) pathogens. For example strain WN2002 was isolated in Wageningen and contains 3 times more

360 polymorphisms in the *pals*-family than in other genes. Strain WN2066 was isolated from the same compost heap  
361 as WN2002, yet contains only 0.27% variation in the *pals*-family compared to an overall genetic variation of  
362 2.67%. Therefore, it is unclear what drives global conservation versus local divergence of the IPR transcriptional  
363 response.

364 **Discussion**

365 In this study we used genetically distinct strains of the nematode *C. elegans* to measure the transcriptional  
366 response upon Orsay virus infection in a genotype- and time-dependent matter. We found that genetic variation  
367 in *C. elegans* determines the Intracellular Pathogen Response (IPR): a transcriptional response that counteracts  
368 pathogens by increased proteostasis (Reddy et al. 2017, 2019). In the reference strain N2 this response leads to  
369 activation of several members in the *pals*-gene family that in turn activate ubiquitination related genes such as  
370 *skr-3*, *skr-4*, *skr-5*, and *cul-6* (Reddy et al. 2019). In contrast, genes in the *pals*-family are not upregulated in the  
371 strains JU1580 (Sarkies et al. 2013) and CB4856. The *pals*-cluster on chromosome III contains the gene pair  
372 *pals-22* and *pals-25* that together control the IPR (Reddy et al. 2019). Both *pals-22* and *pals-25* are lower  
373 expressed in CB4856 than in N2, likely underlying the difference in IPR between both strains. Multiple *cis*-QTL  
374 indicate that the expression of the *pals*-genes on chromosome III and V is controlled by local regulatory genetic  
375 variation (Li et al. 2006; Rockman et al. 2010; Sterken et al. 2014; Li et al. 2010; Viñuela et al. 2010, 2012;  
376 Snoek et al. 2017). Taken together, the genetic variation found in the *pals*-genes of CB4856 regulates the  
377 expression of IPR genes. An investigation of the worldwide variation within 330 *C. elegans* isolates reveals that  
378 the *pals*-genes show uncharacteristic patterns of genetic variation for this species. Most of the *pals*-genes are  
379 either conserved or few haplotypes exist causing their genetic conservation to be high on a worldwide scale.  
380 Population genetic analyses reveal that these genes are experiencing selective pressure which could be a result of  
381 balancing selection. Therefore, we argue that genetic variation in the *pals*-gene family regulates an evolutionary  
382 important transcriptional response to environmental stress, such as infection.

383

384 *The exact cellular function of most IPR members is unclear*

385 The function of most *pals*-genes is still unclear, even though many of them do become differentially expressed  
386 after intracellular infections. The biochemical function of the one common factor in this family, the so-called  
387 ‘protein containing ALS2cr12 (ALS2CR12) signature’ is still unknown. Besides functioning as an intracellular  
388 defence pathway, the *pals*-genes are involved in handling proteotoxic stress. More specifically, the gene pair  
389 *pals-22* and *pals-25* form a molecular switch between anti-stress and developmental pathways (Reddy et al.  
390 2019). Gene expression of 22 *pals*-genes is enriched in dauer and/or L4 male expressed genes which suggests  
391 these *pals*-genes may have additional functions besides their functioning in the IPR (Gerstein et al. 2014; Leyva-  
392 Díaz et al. 2017). Indeed, one of the *pals*-genes, *pals-22*, is known to have dual biological functions. *pals-22*  
393 controls the IPR and silences repetitive RNA (Leyva-Díaz et al. 2017), although whether both functions are

394 executed via a similar mechanism remains unknown. Moreover, there may be functional redundancy within the  
395 *pals*-genes themselves, even though many *pals*-genes have highly dissimilar DNA and protein sequences  
396 (Leyva-Díaz et al. 2017). The gene pair *pals-22* and *pals-25* has been shown to regulate gene expression of other  
397 members in the IPR, however in *pals-22;pals-25* double mutants the other IPR genes can still respond to  
398 infection (Reddy et al. 2019).

399

400 *IPR genes of the pals-family are under selection*

401 Multiple *pals*-genes show high Tajima's D values, in particular the genes on the first and second cluster on  
402 chromosome III (0.1 and 1.4Mb) that all but one fall within the top 10% of genes with the highest Tajima's D  
403 values. Positive Tajima's D values indicate either balancing selection or a lack of rare alleles whereas negative  
404 Tajima's D values show that rare alleles are present at high frequencies or there has been a recent selective  
405 sweep or population bottleneck (Tajima 1989). For *C. elegans* most of the genes show negative Tajima's D  
406 values due to a recent selective sweep affecting chromosome I, IV, V, and X greatly reducing the genetic  
407 variation within the species (Andersen et al. 2012). After a selective sweep, novel genetic variation arises  
408 depending on the mutation rate and spreads depending on the outcrossing and migration rate of the species. The  
409 mutation rate in *C. elegans* is comparable to other multicellular species such as *Drosophila* (Denver et al. 2009;  
410 Haag-Liautard et al. 2007; Denver et al. 2004), however the outcrossing rate in *C. elegans* is exceptionally low.  
411 Estimated outcrossing rates in the wild range from 1-0.1% per generation (Andersen et al. 2012; Barrière and  
412 Félix 2005, 2007). In agreement, males are hardly found in wild populations and outbred populations show lower  
413 fitness (Barrière and Félix 2005; Richaud et al. 2018; Yon Rhee et al. 2008; Dolgin et al. 2007), although higher  
414 male frequencies can be beneficial under stress conditions (Teotonio et al. 2012; Morran et al. 2011, 2009b,  
415 2009a).

416 As *C. elegans* mostly reproduces by selfing, genetic drift is proposed to be the main source of natural  
417 variation (Cutter 2010). In agreement, there has been little evidence for selection in *C. elegans*, but balancing  
418 selection can occur when environmental conditions determine the fitness of the strain. In that case, the benefit of  
419 the allele depends on the present environment and several alleles may be maintained actively in the population  
420 (Greene et al. 2016; Teotonio et al. 2017). The *pals*-genes with relatively high Tajima's D values on  
421 chromosome III are located in a region estimated to have diverged  $10^6$  generations ago. Despite this early  
422 divergence, few haplotypes occur for this region which could result from long-term balancing selection  
423 (Thompson, et al. 2015). The transcriptional regulators of the IPR, *pals-22* and *pals-25*, fall within this region



424 and are expected to have robust transcription within the IPR pathway for most *C. elegans* isolates in general.  
425 This is in line with our results that show only a minority of strains, including CB4856, carry distinct regulatory  
426 genetic variants. The transcriptome in *C. elegans* was shown to experience high stabilizing selection, thus  
427 favouring robust transcription of genes on a population level despite genetic variation (Denver et al. 2005). Yet,  
428 some strains potentially harbour regulatory genetic variation which may be beneficial in certain environments.  
429 Possibly, when environmental stress is present, constant growth may be preferred over the *pals-22/pals-25*  
430 molecular switch controlling growth and anti-stress programs. Therefore, the *pals*-gene evolution could result  
431 from an environmental factor such as pathogen presence.

432 Finding out which environmental factor could explain the population genetic patterns within the *pals*-  
433 genes of the IPR will be challenging. The IPR pathway has been shown to respond to multiple environmental  
434 stressors including intestinal and epidermal pathogens, but also heat stress (Reddy et al. 2019, 2017). Despite the  
435 increasing amount of ecological data for both *C. elegans* (Cook et al. 2017) and its pathogens (Richaud et al.  
436 2018; Zhang et al. 2016), it is not yet sufficient to draw any firm conclusions whether co-occurrence of host and  
437 pathogen drives evolution within the *pals*-family. However, some evidence exists that host-pathogen interactions  
438 can affect the genotypic diversity at a population level. In Orsay (France), the location where Orsay virus is  
439 found, diversity in pathogen susceptibility potentially explains the maintenance of several minority genotypes.  
440 These genotypes are outcompeted in the absence of the intracellular pathogen *Nematocida parisii*, but perform  
441 better in the presence of the pathogen (Richaud et al. 2018). Additional transcriptional and genotypic  
442 investigation of the strains isolated in Orsay could reveal if IPR activity explains these observations. Moreover,  
443 *C. elegans* populations may experience distinct heat stress on the microscale they live in than expected based on  
444 the overall weather conditions at the sampling location (Petersen et al. 2014). Experimental evolutionary  
445 experiments hold the potential to bridge to gap between the lab and the field by investigating if the presence of  
446 intracellular pathogens or application of heat stress invokes any genetic and transcriptional changes within the  
447 *pals*-family (Gray and Cutter 2014; Teotonio et al. 2017).

448

#### 449 *The IPR response is genotype dependent*

450 The viral susceptibility of *C. elegans* does not link directly to the IPR transcriptional response as CB4856 and  
451 JU1580 both lack upregulation of most *pals*-genes, but differ strongly in viral susceptibility. Compared to  
452 CB4856 the strain JU1580 harbours less genetic variation within the *pals*-family (11% and 6% respectively)  
453 when compared to the reference strain N2. Moreover, the expression pattern over time for *pals-22* and *pals-25*

454 was similar between N2 and JU1580 (data not shown). Thus, the absence of a (strong) IPR in JU1580 could have  
455 another source than in CB4856. We hypothesise that crosstalk with the RNAi response is necessary to activate  
456 the IPR, since upregulation of *pals*-genes is also not occurring in *rde-1*, *sta-1*, and *sid-3* mutants in the N2  
457 background (Tanguy et al. 2017; Chen et al. 2017). The genes *sta-1* and *sid-3* are involved in activation of the  
458 RNAi pathway, whereas *rde-1* is involved further downstream in the RNAi pathway mutants (Tanguy et al.  
459 2017; Chen et al. 2017). Conjunction between the RNAi pathway and *pals-22* has been suggested before by  
460 results from Leyva-Díaz *et al.* showing that *pals-22* silences transgenes in wild-type animals. Yet when the  
461 RNAi gene *rde-4* is mutated, *pals-22* cannot execute its silencing function anymore (Leyva-Díaz et al. 2017).  
462 Antiviral RNAi in *C. elegans* functions via both *rde-4* dependent and *rde-4* independent mechanisms. In the *rde-*  
463 *4* dependent mechanism *rde-4* was proposed to process viral dsRNAs together with *drh-1* (Guo et al. 2013). A  
464 dependency of the IPR on the RNAi pathway may explain why IPR activation would be lacking in the *drh-1*  
465 deficient strain JU1580. Furthermore, most OrV transcriptional studies so far have focused on genes with a  
466 function in the IPR or the RNAi pathway. Yet transcriptional studies have yielded several genes with functions  
467 that do not (yet) link to any of the two pathways (Tanguy et al. 2017; Sarkies et al. 2013; Chen et al. 2017). The  
468 function of these genes in OrV infection could further enlighten the complexity of host-virus interactions.

469

#### 470 *CB4856 resistance to OrV does not result in a clear transcriptional response*

471 The CB4856 strain does not show a transcriptional response to OrV once the maximum viral load is reached.  
472 There are several non-exclusive explanations as to why CB4856 does not show transcriptional changes. First, the  
473 viral loads may not be high enough to induce transcriptional changes in CB4856. Yet some of the CB4856  
474 samples analysed contain viral loads equalling the viral loads of N2 samples that show transcriptional changes.  
475 Second, some *pals*-genes in CB4856 vary in temporal gene expression. Higher expression of IPR genes upon  
476 infection may speed up the process of counteracting viral infection to minimize its impact, thereby allowing for  
477 quick transcriptional recovery. Last, the IPR transcriptional antiviral response in CB4856 may be less efficient  
478 than that of N2, but this is compensated by other genes. N2 and CB4856 are among the most genetically diverse  
479 *C. elegans* strains resulting in a large set of different protein variants (Thompson et al. 2015). Possibly some  
480 CB4856 variants, for example one encoding an antiviral protein, could have a higher binding affinity to its target  
481 than the N2 variant. In that case, upregulation of the CB4856 variant may not be necessary to in the end still  
482 effectively counteract the viral infection.

483

484 *Future perspectives*

485 This study built a large dataset for the transcriptional response upon OrV infection in the genotypes N2 and  
486 CB4856 and temporally transcriptional data for three genotypes. For the first time the OrV transcriptional  
487 response was measured in the genotype CB4856 and in a temporally detailed manner for this genotype and the  
488 genotypes N2 and JU1580. However, the study design also contains some limitations. First, the use of  
489 microarrays that are designed for the N2 genotype is estimated to affect about 1600 spots (3.5%) due to  
490 hybridisation differences (Snoek et al. 2017). Subsequent studies could make use of RNA-seq techniques,  
491 although this data also needs to be carefully handled to ensure that genetic variants are mapped to the correct  
492 reference genes in the N2 or CB4856 genome (The *C. elegans* Sequencing Consortium 1998; Thompson et al.  
493 2015; Piskol et al. 2013; Deelen et al. 2015). Second, although we did not detect any transcriptional changes in  
494 the strain CB4856, there may be local changes in the intestinal cells and for certain individuals. Orsay virus  
495 infection does not infect all individuals within the population and its cellular tropism is limited to the intestinal  
496 cells (Félix et al. 2011; Franz et al. 2013). Therefore, local changes will be largely diluted in a population  
497 readout. Transcriptional techniques, such as single-cell RNA-seq or TOMO-seq (Ebbing et al. 2018; Trapnell et  
498 al. 2017), that identify gene expression within infected cells will provide more details about the transcriptional  
499 response in the cells at stake. Third, the samples for the timeseries were taken in a temporally highly detailed  
500 manner by investigating 12 timepoints within 30 hours. Yet, the effect of development is large, confounding the  
501 identification of the relatively small effect of viral infection over time. Further research investigating the effect  
502 of development on gene expression and infection over time may reveal additional information on the temporal  
503 expression of Genes responding to OrV infection.

504 This study provides insights into the natural context of the evolutionary conserved genetic and the  
505 plastic, transcriptional response after infection. Our results show that genetic variation within *C. elegans* natural  
506 isolates correlates to diversity in the transcriptional response upon OrV infection, thus indicating how genetic  
507 variation can shape the transcriptional response after infection. We show that few genetic variations occur  
508 worldwide within clusters of *pals*-genes that regulate the IPR transcriptional response. Therefore, we suggest  
509 that genes that function in the IPR transcriptional responses experience an evolutionary pressure such as  
510 presence of intracellular pathogens. However, the importance of the transcriptional responses appears to vary as  
511 well, as the activity of the IPR response does not directly link to the viral susceptibility. This study provides new  
512 insights into the diversity of ways that host can develop both genetic and transcriptional responses to protect  
513 themselves from harmful infections.



515 **References**

- 516 Alberts R, Terpstra P, Li Y, Breitling R, Nap JP, Jansen RC. 2007. Sequence polymorphisms cause many false  
517 cis eQTLs. *PLoS One* **2**: e622. 10.1371/journal.pone.0000622.
- 518 Andersen EC, Gerke JP, Shapiro JA, Crissman JR, Ghosh R, Bloom JS, Félix M-A, Kruglyak L. 2012.  
519 Chromosome-scale selective sweeps shape *Caenorhabditis elegans* genomic diversity. *Nat Genet* **44**: 285–  
520 290. 10.1038/ng.1050.
- 521 Ashe A, Bélicard T, Le Pen J, Sarkies P, Frézal L, Lehrbach NJ, Félix MA, Miska EA. 2013. A deletion  
522 polymorphism in the *Caenorhabditis elegans* RIG-I homolog disables viral RNA dicing and antiviral  
523 immunity. *Elife* **2**: e00994. 10.7554/eLife.00994.
- 524 Ashe A, Sarkies P, Le Pen J, Tanguy M, Miska EA. 2015. Antiviral RNA Interference against Orsay Virus Is  
525 neither Systemic nor Transgenerational in *Caenorhabditis elegans*. *J Virol* **89**: 12035–12046.  
526 10.1128/JVI.03664-14.
- 527 Bakowski MA, Desjardins CA, Smelkinson MG, Dunbar TA, Lopez-Moyado IF, Rifkin SA, Cuomo CA,  
528 Troemel ER. 2014. Ubiquitin-Mediated Response to Microsporidia and Virus Infection in *C. elegans*.  
529 *PLoS Pathog* **10**: e1004200. 10.1371/journal.ppat.1004200.
- 530 Barrière A, Félix MA. 2005. High local genetic diversity and low outcrossing rate in *Caenorhabditis elegans*  
531 natural populations. *Curr Biol* **15**: 1176–1184. 10.1016/j.cub.2005.06.022.
- 532 Barrière A, Félix MA. 2007. Temporal dynamics and linkage disequilibrium in natural *Caenorhabditis elegans*  
533 populations. *Genetics* **176**: 999–1011. 10.1534/genetics.106.067223.
- 534 Benjamini Y, Hochberg Y. 2009. Controlling the False Discovery Rate: A Practical and Powerful Approach to  
535 Multiple Testing. *J R Stat Soc* **57**: 289–300.
- 536 Brenner S. 1974. The Genetics of *Caenorhabditis elegans*. *Genetics* **77**: 71–94. 10.1111/j.1749-  
537 6632.1999.tb07894.x.
- 538 Capra EJ, Skrovanek SM, Kruglyak L. 2008. Comparative developmental expression profiling of two *C. elegans*  
539 isolates. *PLoS One* **3**: e4055. 10.1371/journal.pone.0004055.
- 540 Chen K, Franz CJ, Jiang H, Jiang Y, Wang D. 2017. An evolutionarily conserved transcriptional response to  
541 viral infection in *Caenorhabditis* nematodes. *BMC Genomics* **18**: 303. 10.1186/s12864-017-3689-3.
- 542 Cook DE, Zdraljevic S, Roberts JP, Andersen EC. 2017. CeNDR, the *Caenorhabditis elegans* natural diversity  
543 resource. *Nucleic Acids Res* **45**: D650–D657. 10.1093/nar/gkw893.
- 544 Cutter AD. 2010. Molecular evolution inferences from the *C. elegans* genome. *WormBook*.  
545 10.1895/wormbook.1.149.1.
- 546 Deelen P, Zhernakova D V., de Haan M, van der Sijde M, Bonder MJ, Karjalainen J, van der Velde KJ, Abbott  
547 KM, Fu J, Wijmenga C, et al. 2015. Calling genotypes from public RNA-sequencing data enables  
548 identification of genetic variants that affect gene-expression levels. *Genome Med* **7**: 1–13. 10.1186/s13073-  
549 015-0152-4.
- 550 Denver DR, Dolan PC, Wilhelm LJ, Sung W, Lucas-Lledo JI, Howe DK, Lewis SC, Okamoto K, Thomas WK,  
551 Lynch M, et al. 2009. A genome-wide view of *Caenorhabditis elegans* base-substitution mutation  
552 processes. *Proc Natl Acad Sci* **106**: 16310–16314. 10.1073/pnas.0904895106.
- 553 Denver DR, Morris K, Lynch M, Thomas WK. 2004. High mutation rate and predominance of insertions in the  
554 *Caenorhabditis elegans* nuclear genome. *Nature* **430**: 679–682. 10.1109/T-ED.1982.21043.
- 555 Denver DR, Morris K, Strelman JT, Kim SK, Lynch M, Thomas WK. 2005. The transcriptional consequences  
556 of mutation and natural selection in *Caenorhabditis elegans*. *Nat Genet* **37**: 544–548. 10.1038/ng1554.
- 557 Dolgin ES, Charlesworth B, Baird SE, Cutter AD. 2007. Inbreeding and outbreeding depression in  
558 *Caenorhabditis* nematodes. *Evolution* **61**: 1339–1352. 10.1111/j.1558-5646.2007.00118.x.

- 559 Ebbing A, Vértesy Á, Betist MC, Spanjaard B, Junker JP, Berezikov E, van Oudenaarden A, Korswagen HC.  
560 2018. Spatial Transcriptomics of *C. elegans* Males and Hermaphrodites Identifies Sex-Specific Differences  
561 in Gene Expression Patterns. *Dev Cell* **47**: 801–813.e6. 10.1016/j.devcel.2018.10.016.
- 562 Félix MA, Ashe A, Piffaretti J, Wu G, Nuez I, Bécicard T, Jiang Y, Zhao G, Franz CJ, Goldstein LD, et al. 2011.  
563 Natural and experimental infection of *Caenorhabditis* nematodes by novel viruses related to nodaviruses.  
564 *PLoS Biol* **9**: e1000586. 10.1371/journal.pbio.1000586.
- 565 Franco LM, Bucacas KL, Wells JM, Niño D, Wang X, Zapata GE, Arden N, Renwick A, Yu P, Quarles JM, et  
566 al. 2013. Integrative genomic analysis of the human immune response to influenza vaccination. *Elife* **2013**:  
567 1–18. 10.7554/eLife.00299.
- 568 Franz CJ, Renshaw H, Frezal L, Jiang Y, Félix M-A, Wang D. 2013. Orsay, Santeuil and Le Blanc viruses  
569 primarily infect intestinal cells in *Caenorhabditis* nematodes. *Virology* **448**: 255–264.  
570 10.1016/j.virol.2013.09.024.
- 571 Gerstein MB, Lu ZJ, Van Nostrand EL, Cheng C, Arshinoff BI, Liu T, Yip KY, Robilotto R, Rechtsteiner A,  
572 Ikegami K, et al. 2000. Integrative Analysis of the *Caenorhabditis elegans* Genome by the modENCODE  
573 Project. *Science* **330**: 1775 LP-1787.
- 574 Gerstein MB, Rozowsky J, Yan K-K, Wang D, Cheng C, Brown JB, Davis CA, Hillier L, Sisu C, Li JJ, et al.  
575 2014. Comparative analysis of the transcriptome across distant species. *Nature* **512**: 445–448.  
576 10.1038/nature13424.
- 577 Gray JC, Cutter AD. 2014. Mainstreaming *Caenorhabditis elegans* in experimental evolution. *Proc Biol Sci* **281**:  
578 20133055. 10.1098/rspb.2013.3055.
- 579 Greene JS, Dobosiewicz M, Butcher RA, McGrath PT, Bargmann CI. 2016. Regulatory changes in two  
580 chemoreceptor genes contribute to a *Caenorhabditis elegans* QTL for foraging behavior. *Elife* **5**: 1–19.  
581 10.7554/eLife.21454.
- 582 Guo X, Zhang R, Wang J, Lu R. 2013. Antiviral RNA Silencing Initiated in the Absence of RDE-4, a Double-  
583 Stranded RNA Binding Protein, in *Caenorhabditis elegans*. *J Virol* **87**: 10721–10729. 10.1128/JVI.01305-  
584 13.
- 585 Haag-Liautaud C, Dorris M, Maside X, Macaskill S, Halligan DL, Charlesworth B, Keightley PD. 2007. Direct  
586 estimation of per nucleotide and genomic deleterious mutation rates in *Drosophila*. *Nature* **445**: 82–85.  
587 10.1038/nature05388.
- 588 Le Pen J, Jiang H, Di Domenico T, Kneuss E, Kosalka J, Leung C, Morgan M, Much C, Rudolph KLM, Enright  
589 AJ, et al. 2018. Terminal uridylyltransferases target RNA viruses as part of the innate immune system. *Nat*  
590 *Struct Mol Biol* **25**: 778–786. 10.1038/s41594-018-0106-9.
- 591 Lee RYN, Howe KL, Harris TW, Arnaboldi V, Cain S, Chan J, Chen WJ, Davis P, Gao S, Grove C, et al. 2018.  
592 WormBase 2017: Molting into a new stage. *Nucleic Acids Res* **46**: D869–D874. 10.1093/nar/gkx998.
- 593 Leyva-Díaz E, Stefanakis N, Carrera I, Glenwinkel L, Wang G, Driscoll M, Hobert O. 2017. Silencing of  
594 repetitive DNA is controlled by a member of an unusual *Caenorhabditis elegans* gene family. *Genetics*  
595 **207**: 529–545. 10.1534/genetics.117.300134.
- 596 Li Y, Álvarez OA, Gutteling EW, Tijsterman M, Fu J, Riksen JAG, Hazendonk E, Prins P, Plasterk RHA, Jansen  
597 RC, et al. 2006. Mapping determinants of gene expression plasticity by genetical genomics in *C. elegans*.  
598 *PLoS Genet* **2**: 2155–2161. 10.1371/journal.pgen.0020222.
- 599 Li Y, Breitling R, Snoek LB, Van Der Velde KJ, Swertz MA, Riksen J, Jansen RC, Kammenga JE. 2010. Global  
600 genetic robustness of the alternative splicing machinery in *Caenorhabditis elegans*. *Genetics* **186**: 405–  
601 410. 10.1534/genetics.110.119677.
- 602 Morran LT, Cappy BJ, Anderson JL, Phillips PC. 2009a. Sexual partners for the stressed: Facultative outcrossing  
603 in the self-fertilizing nematode *Caenorhabditis elegans*. *Evolution* **63**: 1473–1482. 10.1111/j.1558-  
604 5646.2009.00652.x.

- 605 Morran LT, Parmenter MD, Phillips PC. 2009b. Mutation load and rapid adaptation favour outcrossing over self-  
606 fertilization. *Nature* **462**: 350–352. 10.1038/nature08496.
- 607 Morran LT, Schmidt OG, Gelarden IA, Parrish RC, Lively CM. 2011. Running with the Red Queen: Host-  
608 parasite coevolution selects for biparental sex. *Science* **333**: 216–218. 10.1126/science.1206360.
- 609 Petersen C, Dirksen P, Prah S, Strathmann E, Schulenburg H. 2014. The prevalence of *Caenorhabditis elegans*  
610 across 1.5 years in selected North German locations: the importance of substrate type, abiotic parameters,  
611 and *Caenorhabditis* competitors. *BMC Ecol* **14**: 4. 10.1186/1472-6785-14-4.
- 612 Pfeifer B, Wittelsbürger U, Ramos-Onsins SE, Lercher MJ. 2014. PopGenome: An efficient swiss army knife for  
613 population genomic analyses in R. *Mol Biol Evol* **31**: 1929–1936. 10.1093/molbev/msu136.
- 614 Piasecka B, Duffy D, Urrutia A, Quach H, Patin E, Posseme C, Bergstedt J, Charbit B, Rouilly V, MacPherson  
615 CR, et al. 2018. Distinctive roles of age, sex, and genetics in shaping transcriptional variation of human  
616 immune responses to microbial challenges. *Proc Natl Acad Sci* **115**: E488–E497.  
617 10.1073/pnas.1714765115.
- 618 Piskol R, Ramaswami G, Li JB. 2013. Reliable identification of genomic variants from RNA-seq data. *Am J*  
619 *Hum Genet* **93**: 641–651. 10.1016/j.ajhg.2013.08.008.
- 620 Reddy KC, Dror T, Sowa JN, Panek J, Chen K, Lim ES, Wang D, Troemel ER. 2017. An Intracellular Pathogen  
621 Response Pathway Promotes Proteostasis in *C. elegans*. *Curr Biol* **27**: 3544–3553.e5.  
622 10.1016/j.cub.2017.10.009.
- 623 Reddy KC, Dror T, Underwood RS, Osman GA, Desjardins CA, Cuomo CA, Barkoulas M, Troemel ER. 2019.  
624 Antagonistic paralogs control a switch between growth and pathogen resistance in *C. elegans*. *Plos Pathog*  
625 **15**: e1007528. <https://doi.org/10.1371/journal.ppat.1007528>.
- 626 Richaud A, Zhang G, Lee D, Lee J, Félix M-AA. 2018. The Local Coexistence Pattern of Selfing Genotypes in  
627 Natural Metapopulations. *Genetics* **208**: 807–821. 10.1534/genetics.117.300564/-/DC1.1.
- 628 Rockman M V., Skrovaneck SS, Kruglyak L. 2010. Selection at Linked Sites Shapes Heritable Phenotypic  
629 Variation in *C. elegans*. *Science* **330**: 372–376. 10.1126/science.1194208.
- 630 Sarkies P, Ashe A, Le Pen J, McKie MA, Miska EA. 2013. Competition between virus-derived and endogenous  
631 small RNAs regulates gene expression in *Caenorhabditis elegans*. *Genome Res* **23**: 1258–1270.  
632 10.1101/gr.153296.112.
- 633 Smyth GK, Speed T. 2003. Normalization of cDNA microarray data. *Methods* **31**: 265–273. 10.1016/S1046-  
634 2023(03)00155-5.
- 635 Snoek BL, Sterken MG, Bevers RPJ, Volkers RJM, van't Hof A, Brenchley R, Riksen JAG, Cossins A,  
636 Kammenga JE. 2017. Contribution of trans regulatory eQTL to cryptic genetic variation in *C. elegans*.  
637 *BMC Genomics* **18**: 1–15. 10.1186/s12864-017-3899-8.
- 638 Snoek LB, Sterken MG, Volkers RJM, Klatter M, Bosman KJ, Bevers RPJ, Riksen JAG, Smant G, Cossins AR,  
639 Kammenga JE. 2015. A rapid and massive gene expression shift marking adolescent transition in *C.*  
640 *elegans*. *Sci Rep* **4**: 3912. 10.1038/srep03912.
- 641 Stein L, Sternberg PW, Durbin R, Thierry-Mieg J, Spieth J. 2002. WormBase: network access to the genome and  
642 biology of *Caenorhabditis elegans*. *Nucleic Acids Res* **29**: 82–86. 10.1093/nar/29.1.82.
- 643 Sterken MG, Snoek LB, Bosman KJ, Daamen J, Riksen JAG, Bakker J, Pijlman GP, Kammenga JE. 2014. A  
644 heritable antiviral RNAi response limits orsay virus infection in *Caenorhabditis elegans* N2. *PLoS One* **9**:  
645 e89760. 10.1371/journal.pone.0089760.
- 646 Tajima F. 1989. Statistical Method for Testing the Neutral Mutation Hypothesis by DNA Polymorphism.  
647 *Genetics* **123**: 585–595.
- 648 Tanguy M, Véron L, Stempor P, Ahringer J, Sarkies P, Miska EA. 2017. An alternative STAT signaling pathway  
649 acts in viral immunity in *Caenorhabditis elegans*. *MBio* **8**: 1–16. 10.1128/mBio.00924-17.



- 650 Teotonio H, Carvalho S, Manoel D, Roque M, Chelo IM. 2012. Evolution of outcrossing in experimental  
651 populations of *Caenorhabditis elegans*. *PLoS One* **7**: e35811. 10.1371/journal.pone.0035811.
- 652 Teotonio H, Estes S, Phillips PC, Baer CF. 2017. Experimental Evolution with *Caenorhabditis* Nematodes.  
653 *Genetics* **206**: 691–716. 10.1534/genetics.115.186288/-/DC1.1.
- 654 Tepper RG, Ashraf J, Kaletsky R, Kleemann G, Murphy CT, Bussemaker HJ. 2013. PQM-1 complements DAF-  
655 16 as a key transcriptional regulator of DAF-2-mediated development and longevity. *Cell* **154**: 676–690.  
656 10.1016/j.cell.2013.07.006.
- 657 The *C. elegans* Sequencing Consortium. 1998. Genome Sequence of the Nematode *C. elegans*: A Platform for  
658 Investigating Biology. *Science* **282**: 2012–2018. 10.1126/science.282.5396.2012.
- 659 Thompson OA, Snoek LB, Nijveen H, Sterken MG, Volkens RJM, Brenchley R, van't Hof A, Bevers RPJ,  
660 Cossins AR, Yanai I, et al. 2015. Remarkably divergent regions punctuate the genome assembly of the  
661 *Caenorhabditis elegans* hawaiian strain CB4856. *Genetics* **200**: 975–989. 10.1534/genetics.115.175950.
- 662 Trapnell C, Furlan SN, Waterston RH, Huynh C, Cao J, Adey A, Shendure J, Steemers FJ, Daza R, Cusanovich  
663 DA, et al. 2017. Comprehensive single-cell transcriptional profiling of a multicellular organism. *Science*  
664 **357**: 661–667. 10.1126/science.aam8940.
- 665 van Sluijs L, Pijlman GP, Kammenga JE. 2017. Why do individuals differ in viral susceptibility? A story told by  
666 model organisms. *Viruses* **9**: 1–13. 10.3390/v9100284.
- 667 Viñuela A, Snoek LB, Riksen JAG, Kammenga JE. 2012. Aging Uncouples Heritability and Expression-QTL in  
668 *Caenorhabditis elegans*. *G3 Genes/Genomes/Genetics* **2**: 597–605. 10.1534/g3.112.002212.
- 669 Viñuela A, Snoek LB, Riksen JAG, Kammenga JE. 2010. Genome-wide gene expression regulation as a  
670 function of genotype and age in *C. elegans*. *Genome Res* **20**: 929–937. 10.1101/gr.102160.109.
- 671 Wang L, Pittman KJ, Barker JR, Salinas RE, Stanaway IB, Williams GD, Carroll RJ, Balmat T, Ingham A,  
672 Gopalakrishnan AM, et al. 2018. An Atlas of Genetic Variation Linking Pathogen-Induced Cellular Traits  
673 to Human Disease. *Cell Host Microbe* **24**: 308–323.e6. 10.1016/j.chom.2018.07.007.
- 674 Yon Rhee S, Wood V, Dolinski K, Draghici S. 2008. Use and misuse of the gene ontology annotations. *Nat Rev*  
675 *Genet* **9**: 509–515. 10.1038/nrg2363.
- 676 Zahurak M, Parmigiani G, Yu W, Scharpf RB, Berman D, Schaeffer E, Shabbeer S, Cope L. 2007. Pre-  
677 processing Agilent microarray data. *BMC Bioinformatics* **8**: 1–13. 10.1186/1471-2105-8-142.
- 678 Zhang G, Sachse M, Prevost M-C, Luallen RJ, Troemel ER, Felix M-A. 2016. A Large Collection of Novel  
679 Nematode- Infecting Microsporidia and Their Diverse Interactions with *Caenorhabditis elegans* and Other  
680 Related Nematodes. *PLoS Pathog* **12**. 10.1371/journal.ppat.1006093.
- 681



682 **Declarations**

683

684 *Availability of data and materials*

685 All strains used can be requested from the authors. The transcriptome datasets generated are deposited at

686 ArrayExpress (E-MTAB-7573 and E-MTAB-7574).

687

688 *Competing interests*

689 The authors declare that they have no competing interests.

690

691 *Funding*

692 LvS was funded by the NWO (Nederlandse Organisatie voor Wetenschappelijk Onderzoek) (824.15.006), MGS

693 was funded by the Graduate School Production Ecology & Resource Conservation (PE&RC).

694

695 *Authors' contributions*

696 BLS, GPP, JEK and MGS conceived and designed the experiments. LvS, KB, FP, TB, JAGR, and MGS

697 conducted the experiments. LvS and MGS conducted transcriptome and main analyses. LvS, GPP, JEK, and

698 MGS wrote the manuscript. All authors read and provided comments on the manuscript.

699

700 *Acknowledgements*

701 The authors want to thank Erik Andersen for hosting and sharing natural variation data on CeNDR and his

702 advice on population genetic analyses.

703 **Figure legends**

704 **Figure 1 Viral susceptibility of *C. elegans* N2, CB4856 and JU1580** – A) Strains were infected 26 hours post  
705 bleaching by liquid exposure to OrV for 1 hour. 30 hours after the exposure nematodes were collected and flash  
706 frozen before further processing. B) Viral loads ( $\log_2$ ) for the genotypes N2, CB4856 and JU1580 after exposure  
707 to 20, 50 or 100 $\mu$ L OrV/500 $\mu$ L infection solution (student *t*-test; \*  $p < 0.05$ ).

708

709 **Figure 2 Differentially expressed genes upon OrV infection in *C. elegans* N2 and CB4856** – A) Vulcano plot  
710 showing the effect of treatment on global gene expression patterns. Spots (blue) above the FDR threshold (dotted  
711 line) were considered differentially expressed. B) Vulcano plot showing the effect of the interaction between  
712 treatment and genotype on global gene expression patterns. Genes (blue) above the FDR threshold (dotted line)  
713 were considered differentially expressed. C) Venn diagram indicating the number of genes that are differentially  
714 expressed and associated with an effect treatment and/or genotype x treatment. D)  $\log_2$  ratios for N2 mock, N2  
715 infected, CB4856 mock and CB4856 infected samples of the 30 genes that are differentially expressed upon  
716 treatment or genotype x treatment.

717

718 **Figure 3 Temporally gene expression patterns in *C. elegans* N2, CB4856 and JU1580** – A) Strains were  
719 infected 40 hours post bleaching by liquid exposure to OrV for 1 hour. Nematodes were collected at 1.5, 2, 3, 8,  
720 10, 12, 20.5, 22, 24, 28, 30.5, or 32 hours after exposure and flash frozen before further processing. B) Temporal  
721 gene expression patterns of (un)infected N2, CB4856 and JU1580 for a few example genes.

722

723 **Figure 4 – Gene expression and genetic variation in the *pals*-gene family in *C. elegans* N2 and CB4856** – A)  
724  $\log_2$  ratios of the gene expression of *pals*-genes for N2 mock, N2 infected, CB4856 mock and CB4856 infected  
725 samples. B)  $\log_2$  intensities of four *pals*-genes in N2 mock, N2 infected, CB4856 mock and CB4856 infected  
726 samples. C) The number of natural variants that occur in CB4856 when compared to N2 as the reference strain  
727 (Cook et al. 2017). The *pals*-genes are clustered on chromosome I, III, VI, and V.

728

729 **Figure 5 – Natural variation in the *C. elegans* *pals*-gene family worldwide** – A) The percentage of genetic  
730 variants in the *pals*-gene family compared to the overall natural variation for each of the 330 wild isotypes (Cook  
731 et al. 2017). Blue dots indicate the amount of variation in the *pals*-genes is different than expected from the  
732 overall natural variation (Chi-square test, FDR < 0.0001). B) Tajima's D values per gene in the *C. elegans*

- 733 genome calculated based on the 330 wild isolates in the CeNDR database (Cook et al. 2017). Blue dots indicate  
734 Tajima's D values for *pals*-genes.

735 **Supplementary figures**

736 **Figure S1 Principal component analysis for gene expression in (un)infected *C. elegans* N2 and CB4856 –**  
737 Principal component analysis for the gene expression data obtained for the nematodes that were infected 26  
738 hours post bleaching and collected 30 hours post infection. PC axes that explain at least 5% of the total variation  
739 are shown. The genotype (N2 or CB4856) is indicated by colour and the treatment (mock or OrV infection) is  
740 indicated by shape.

741

742 **Figure S2 Principal component analysis for gene expression in (un)infected *C. elegans* N2, CB4856 and**  
743 **JU1580 –** Principal component analysis for the gene expression data obtained for the nematode that were  
744 infected 40 hours post bleaching and collected at 1.5, 2, 3, 8, 10, 12, 20.5, 22, 24, 28, 30.5, or 32 hours post  
745 infection. PC axes that explain at least 4.9% of the total variation are shown. The genotype (N2, CB4856, or  
746 JU1580) is indicated by colour, treatment (mock or OrV infection) is indicated by shape and the timepoint is  
747 indicated by size.

748

749 **Figure S3 Analysis of *C. elegans* expression patterns for OrV-response genes in the time series data – A)**  
750 Gene expression patterns for N2 mock, N2 infected, CB4856 mock, CB4856 infected, JU1580 mock, and  
751 JU1580 infected nematodes of the 30 Genes responding to OrV infection that were found in dataset of infected  
752 N2 and CB4856 nematodes (infected at 26 and collected at 56 hours post bleaching). B) Correlation coefficients  
753 of the gene expression of N2 mock, N2 infected, CB4856 mock, CB4856 infected, JU1580 mock, and JU1580  
754 infected nematodes over time per OrV response gene.

755

756 **Figure S4 Genetic variation per *pals*-gene per *C. elegans* strain –** The total number of polymorphisms within  
757 the *pals*-gene family is plotted against the number of known polymorphisms per *pals*-gene. Each dot represents a  
758 strain of the CeNDR database and the colour of the strain indicates if the *pals*-family within this strain is  
759 depleted or enriched in polymorphisms as determined by the chi-square test (FDR < 0.0001).

760

761 **Figure S5 Geographical distribution of natural variation within the *C. elegans* *pals*-gene family – A)**  
762 Location of CeNDR isolates worldwide. The amount of natural variation (%) within the *pals*-pathway is  
763 indicated by the colour of the dot. All natural isolates have been grouped in a quantile (the first quantile exhibits  
764 least natural variation in the *pals*-pathway, the fourth exhibits most natural variation). B) Zoomed in

765 representation of Figure 4A of the strains collected in Europe. C) Zoomed in representation of Figure 4A of the  
766 strains collected on Hawaii.

767 **Supplementary tables**

768 **Table S1** Overview of *C. elegans* genes involved in OrV infection described in literature

769

770 **Table S2** Alignment of *C. elegans* CB4856 sequence to probes that amplify the *pals*-genes

771

772 **Table S3** *cis*- and *trans*-eQTL found for the *pals*-genes

773

774 **Table S4** Conservation, haplotype number and Tajima's D value per *pals*-gene

**A**

time after synchronization: 26h

time after synchronization: 56h

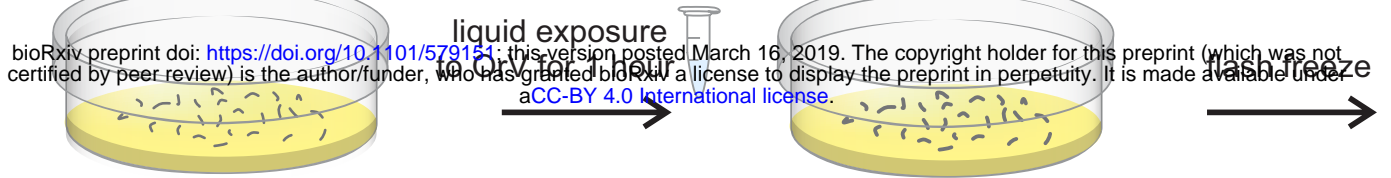**B**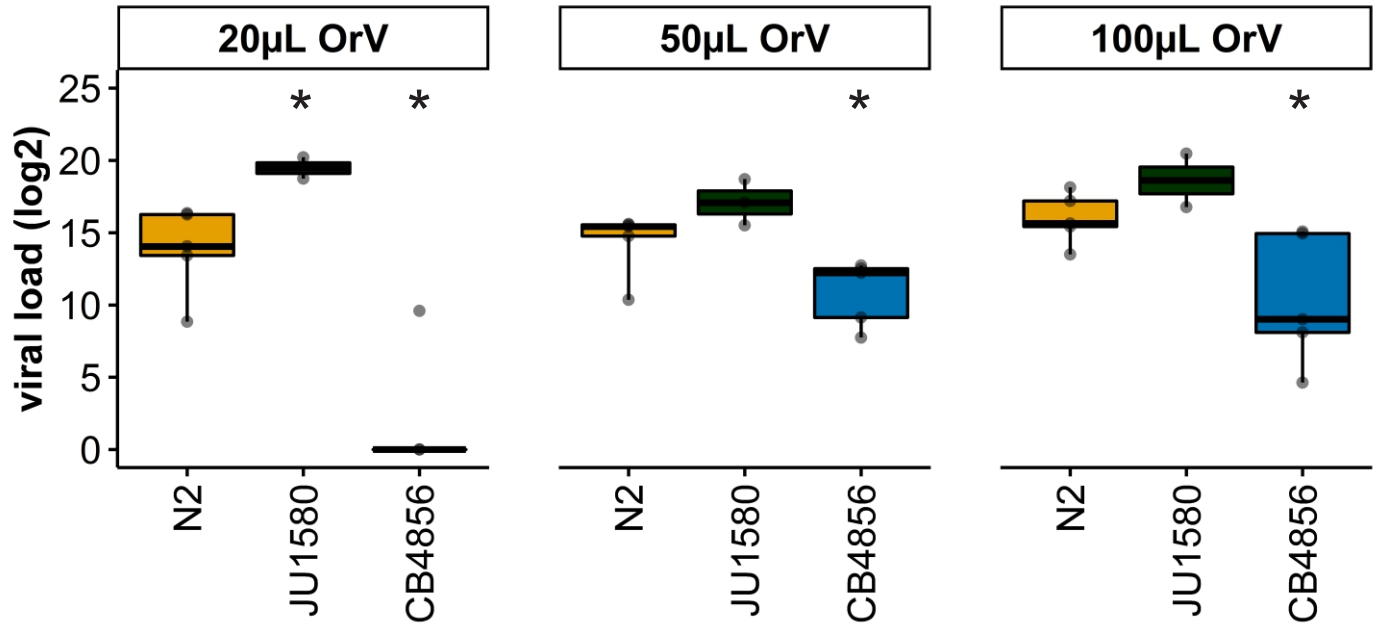

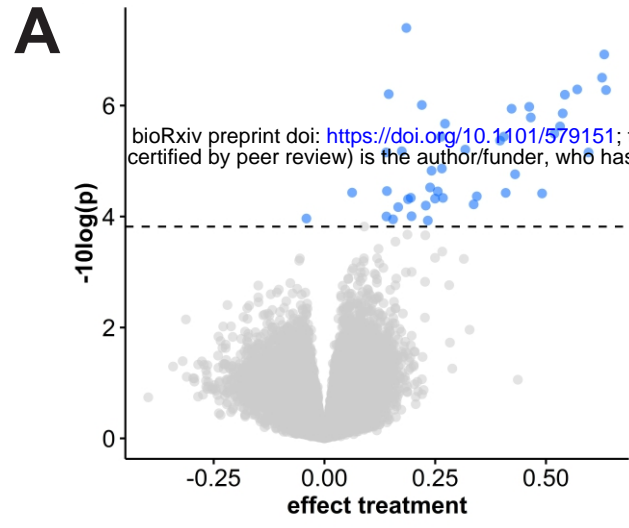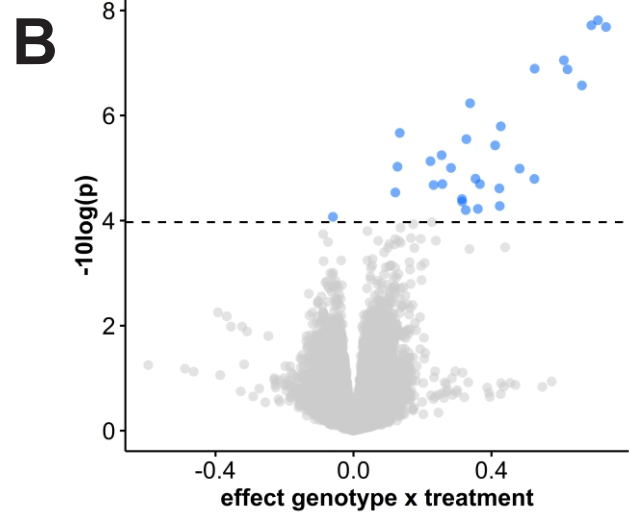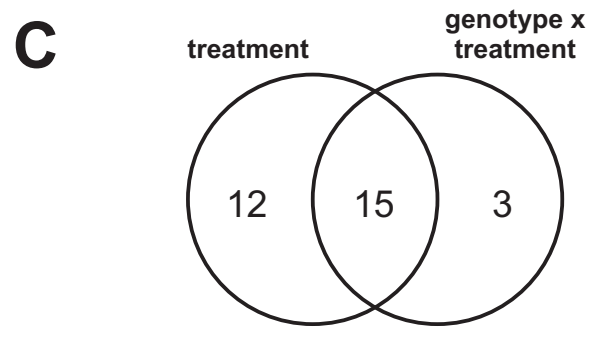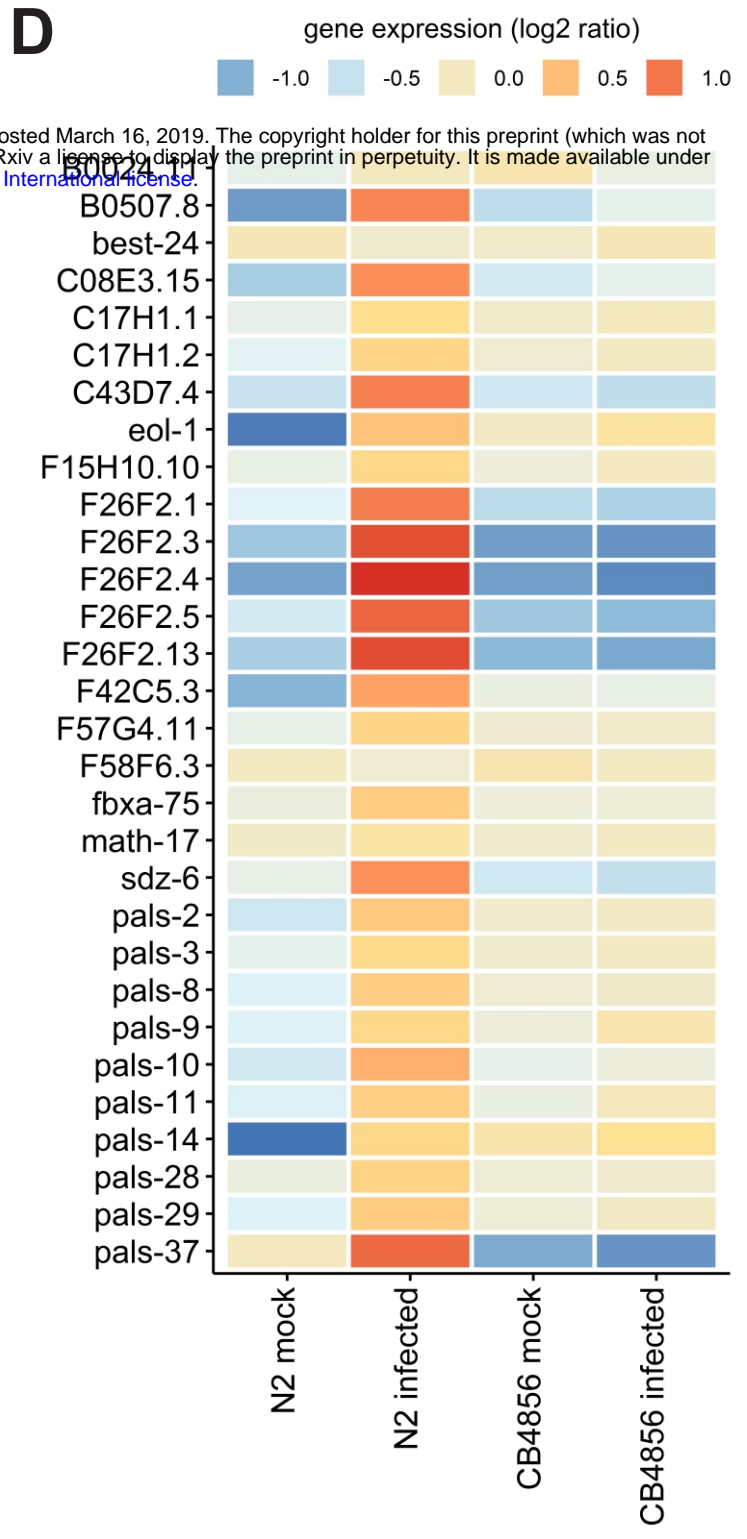



**A**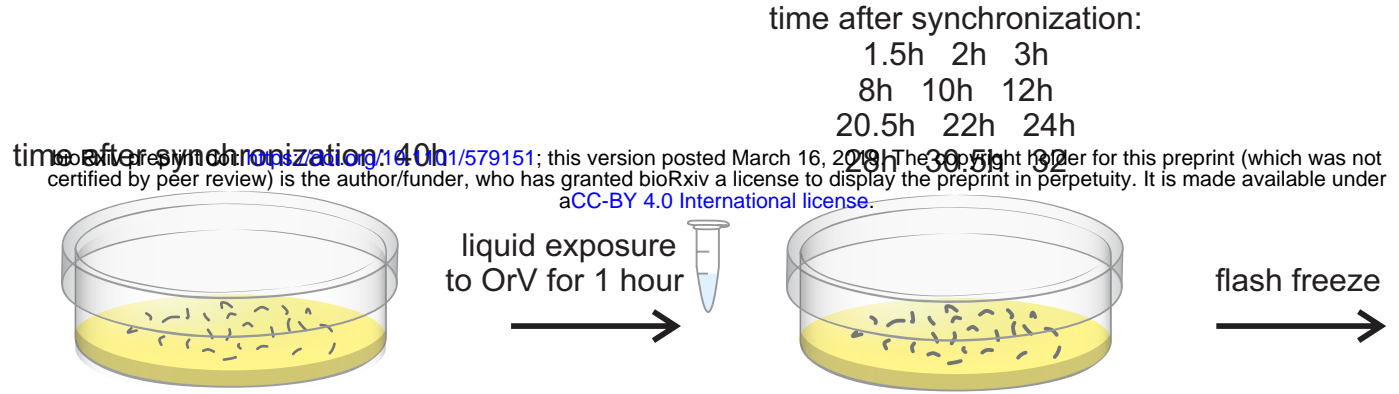**B**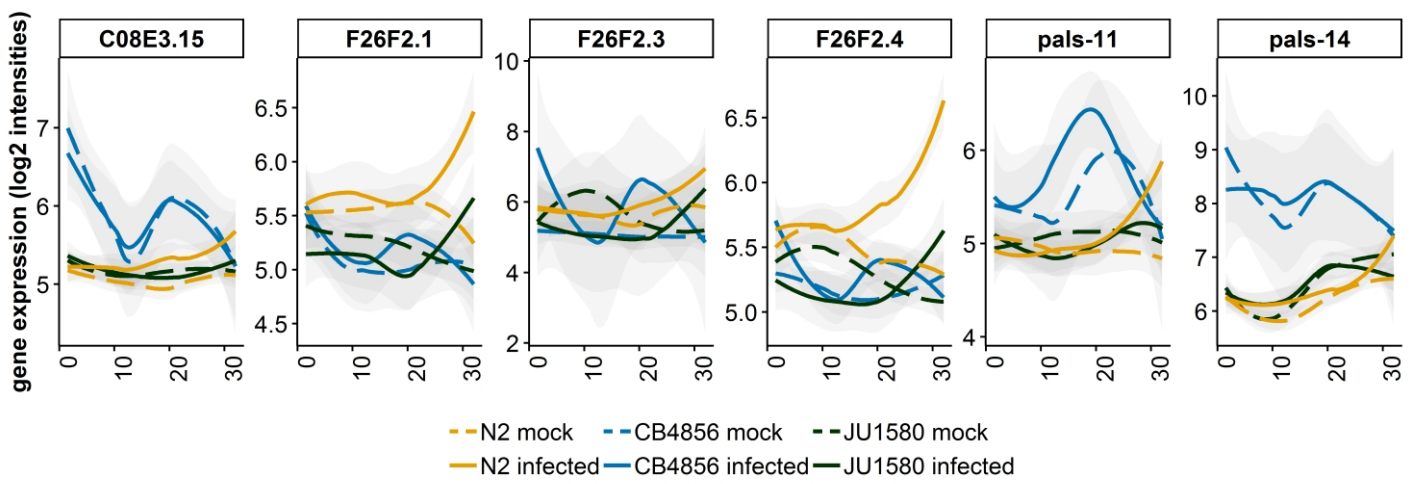

**A**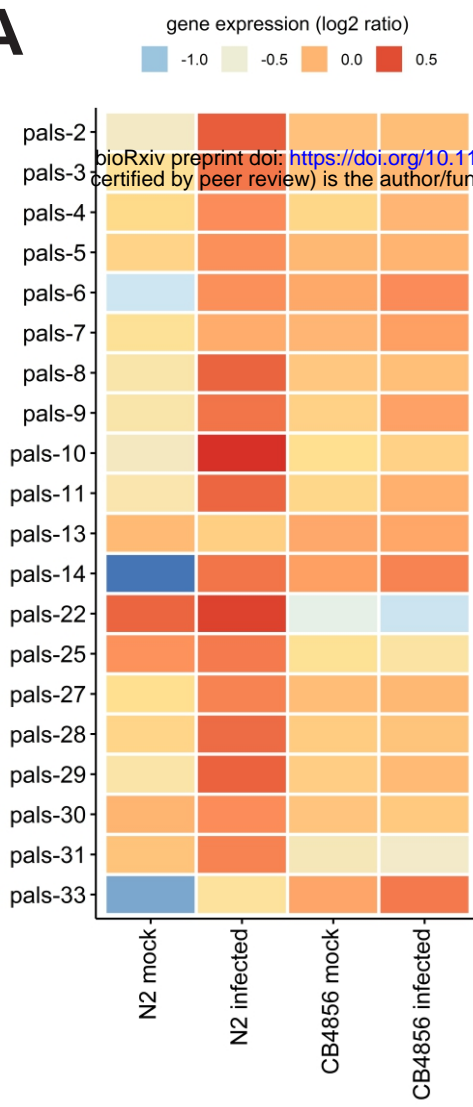**B**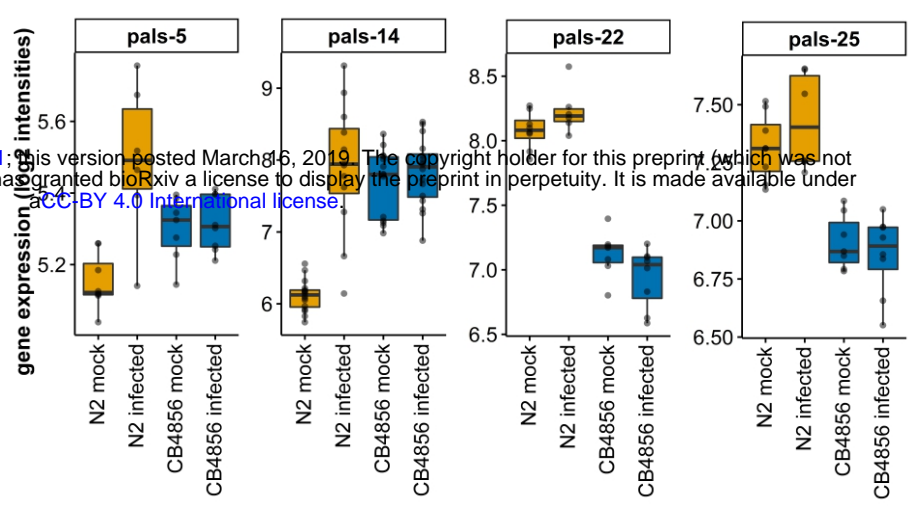**C**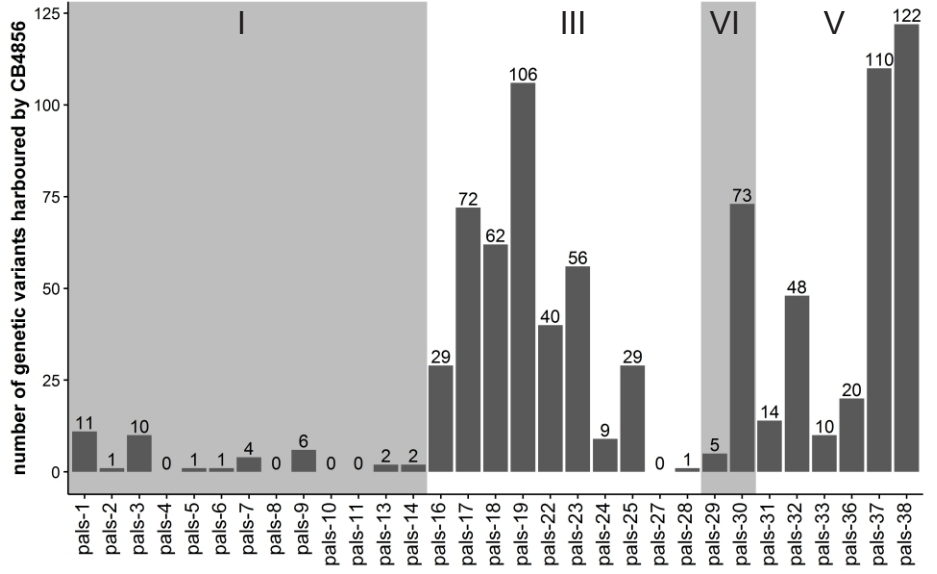

**A**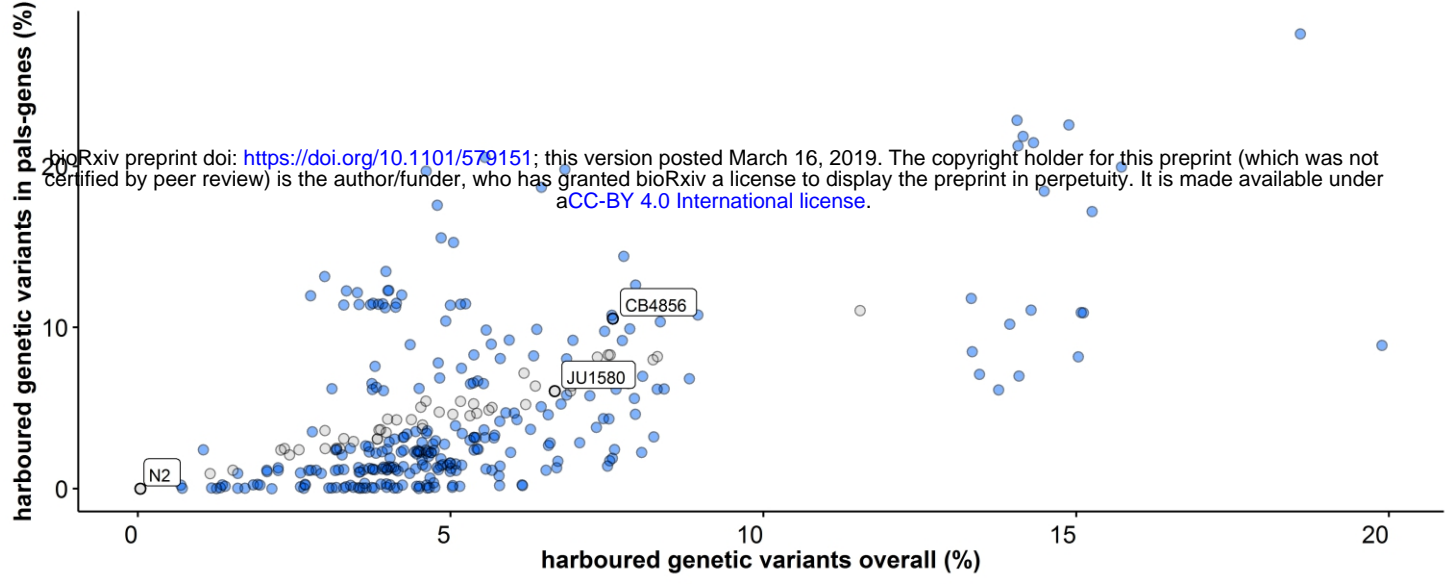**B**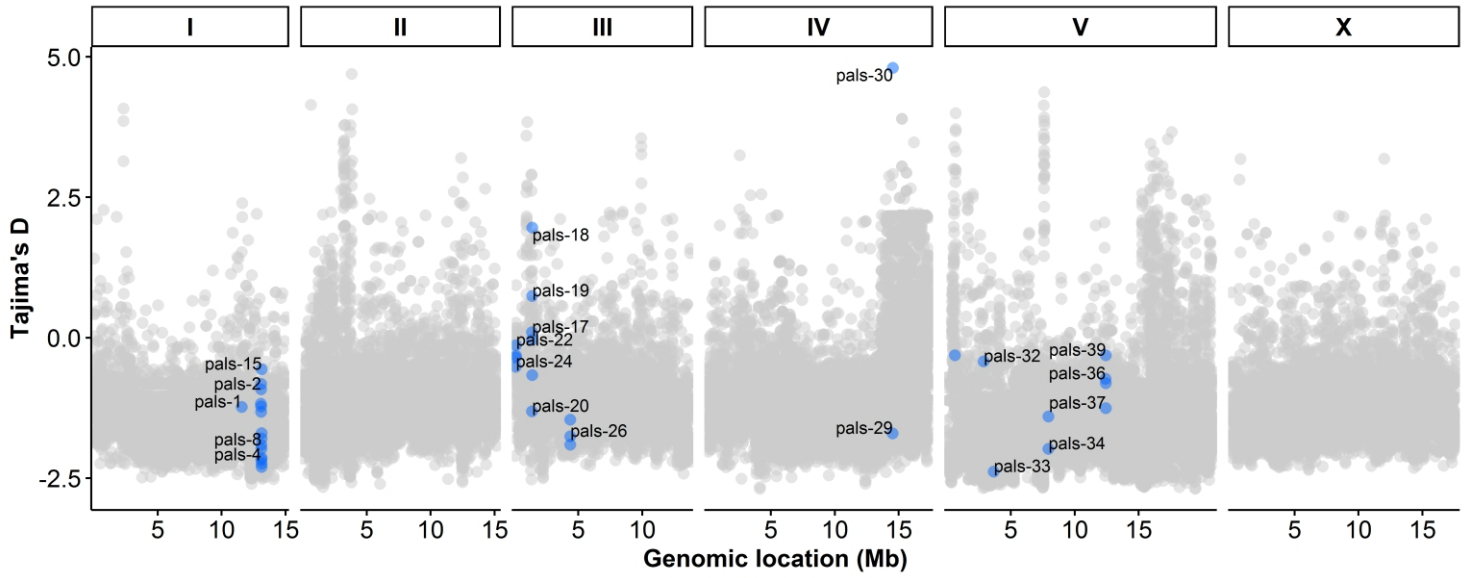

Source: http://biorxiv.org/content/10.1101/579151v1.full.pdf
